# Supplementary material for: In situ tetrazole templated chair-like decanuclear azido-cobalt(ii) SMM containing both tetra- and octa-hedral Co(ii) ions
Source: Royal Society of Chemistry journal article supplement (doi:10.1039/c4dt03211j), 2014-11-10
Supplement: c4dt03211j1.pdf [file c4dt03211j1.pdf]

## Supporting Information

### In situ tetrazole templated chair-like decanuclear azido-cobalt(II) SMM containing both tetra- and octa-hedral Co(II) ions

Yuan-Zhu Zhang,<sup>\*,a,b</sup> Song Gao<sup>a</sup>, Osamu Sato,<sup>\*,b</sup>

<sup>a</sup> Beijing National Laboratory for Molecular Sciences, State Key Laboratory of Rare Earth Materials Chemistry and Applications, College of Chemistry and Molecular Engineering, Peking University, 100871 Beijing, China. Fax: (+86)-10-62751708; Tel: (+86)-10-62756320; E-mail: gaosong@pku.edu.cn

<sup>b</sup> Institute for Materials Chemistry and Engineering, Kyushu University, 6-1 Kasuga, 816-8580, Fukuoka, Japan; Fax & Tel: (+81)92-583-7787; E-mail: sato@cm.kyushu-u.ac.jp

---

## Experimental Section

### Materials and Physical Measurements.

All starting materials were commercially available, reagent grade and used as purchased without further purification. Elemental analysis of carbon, hydrogen, and nitrogen were carried out with an Elementary Vario EL. The IR spectra were recorded against pure samples on a Magna-IR 750 spectrophotometer in the 4000-500 cm<sup>-1</sup> region. The measurements of variable-temperature magnetic susceptibility, ac magnetic susceptibility and field-dependence of magnetization were performed on a Quantum Design MPMS XL-5 SQUID magnetometer. The experimental susceptibilities were corrected for the diamagnetism (Pascal's tables).

**Caution!** Perchlorate salts of metal complexes with organic compounds are potentially explosive. Only a small amount of material should be prepared and handled with great care.

### Single Crystal structural data:

The diffraction data collection of **1** was made at 110(2) K on a Bruker APEX diffractometer equipped with a CCD detector. Initial cell parameters were obtained (DENZO) from ten  $\varphi$  frames (SCALEPACK). The data sets were recorded as  $\omega$ -scans at 1.0° step width. Integration was performed with the Bruker SAINT software package and absorption corrections were empirically applied using SADABS. The crystal structure was solved by the direct method (SHELXS-97) and refined by full-matrix least squares (SHELXL-97) on F<sup>2</sup> and

empirical absorption corrections (SADABS) were applied. All non-hydrogen atoms were located by alternating cycles of least squares refinements and difference Fourier maps. All hydrogen atoms were placed at calculated positions. Anisotropic thermal parameters were added for all non-hydrogen atoms.

**Table S1.** Crystallographic data for **1** at 110(2) K.

|                                           |                                     |
|-------------------------------------------|-------------------------------------|
| Compound                                  | <b>1</b>                            |
| crystal color                             | Dark red                            |
| formula                                   | $C_{104}H_{100}Co_{10}N_{70}O_{15}$ |
| formula wt                                | 3159.84                             |
| crystal system                            | Triclinic                           |
| space group                               | P-1                                 |
| wavelength, Å                             | 0.71073                             |
| Temperature, K                            | 110 (2) K                           |
| <i>a</i> , Å                              | 13.565(9)                           |
| <i>b</i> , Å                              | 16.584(11)                          |
| <i>c</i> , Å                              | 18.065(12)                          |
| $\alpha$ , deg                            | 63.652(7)                           |
| $\beta$ , deg                             | 76.183(7)                           |
| $\gamma$ , deg                            | 83.562(8)                           |
| <i>V</i> , Å <sup>3</sup>                 | 3536(4)                             |
| Crystal size                              | 0.11 × 0.10 × 0.06                  |
| <i>D<sub>c</sub></i> , g cm <sup>-3</sup> | 1.484                               |
| <i>Z</i>                                  | 1                                   |
| $\mu$ , mm <sup>-1</sup>                  | 1.222                               |
| F(000)                                    | 1604                                |
| Measured refl.                            | 33924                               |
| unique refl.                              | 12420                               |
| Observed refl. <sup>[a]</sup>             | 7533                                |
| No. of parameters                         | 925                                 |
| Goof                                      | 1.011                               |
| <i>R</i> <sub>1</sub> <sup>a</sup>        | 0.0636                              |
| w <i>R</i> <sub>2</sub> <sup>a</sup>      | 0.1651                              |

$$^{[a]} I \geq 2\sigma(I): R_1 = \frac{\sum ||F_o| - |F_c||}{\sum |F_o|}, wR_2 = \left\{ \frac{\sum [w(F_o^2 - F_c^2)^2]}{\sum [w(F_o^2)^2]} \right\}^{1/2}.$$

**Table S2.** Selected bond distances (Å) and angles (°) for **1**.

|                      |          |                         |           |                           |           |
|----------------------|----------|-------------------------|-----------|---------------------------|-----------|
| C01-N9               | 2.078(5) | N9-C01-N24 <sup>a</sup> | 170.5(2)  | C01 <sup>a</sup> -N24-C04 | 98.9(2)   |
| C01-N24 <sup>a</sup> | 2.088(5) | N9-C01-N1               | 95.9(2)   | C01 <sup>a</sup> -N27-C04 | 98.9(2)   |
| C01-N1               | 2.088(6) | N9-C01-N27 <sup>a</sup> | 90.9(2)   | C01-N9-C02                | 118.0(3)  |
| C01-N27 <sup>a</sup> | 2.121(5) | N9-C01-O1               | 84.6(2)   | C02-N12-C03               | 117.8(2)  |
| C01-O1               | 2.143(4) | N9-C01-N5               | 88.6(2)   | N2-C03-N18-C04            | 118.0(3)  |
| C01-N5               | 2.149(5) | C02-N6                  | 168.6(2)  | C02-N9-C05                | 117.9(3)  |
| C02-N2               | 2.074(6) | N2-C02-N9               | 94.2(2)   | N2-C03-N21-C05            | 117.6(3)  |
| C02-N6               | 2.087(5) | C02-N15                 | 98.0(2)   | N2-N9-N10-N11             | 178.9(7)  |
| C02-N9               | 2.092(5) | C02-N12                 | 91.9(2)   | N2-N12-N13-N14            | 178.5(7)  |
| C02-N15              | 2.095(6) | C02-O2                  | 76.1(2)   | N18-N15-N16-N17           | 176.9(10) |
| C02-N12              | 2.108(6) | C03-N21                 | 92.1(2)   | N18-N19-N20               | 179.3(8)  |
| C02-O2               | 2.117(5) | N18-C03-N12             | 173.9(2)  | N21-N22-N23               | 177.8(8)  |
| C03-N18              | 2.056(6) | N18-C03-N7              | 87.02(19) | N24-N25-N26               | 178.4(7)  |
| C03-N21              | 2.093(6) | N18-C03-N3              | 91.5(2)   | N27-N28-N29               | 178.3(7)  |
| C03-N12              | 2.098(6) | N18-C03-O3              | 95.4(2)   |                           |           |
| C03-N7               | 2.109(5) | N18-C04-N4              | 95.7(2)   |                           |           |
| C03-N3               | 2.107(5) | N18-C04-N27             | 169.9(2)  |                           |           |
| C03-O3               | 2.125(4) | N18-C04-N24             | 90.0(2)   |                           |           |
| C04-N18              | 2.062(5) | N18-C04-N8              | 89.6(2)   |                           |           |
| C04-N4               | 2.086(6) | N18-C04-O4              | 86.6(2)   |                           |           |
| C04-N27              | 2.090(5) | N33-C05-N30             | 105.9(3)  |                           |           |
| C04-N24              | 2.122(5) | N33-C05-N21             | 117.5(3)  |                           |           |
| C04-N8               | 2.147(5) | N33-C05-N15             | 111.8(3)  |                           |           |
| C04-O4               | 2.184(4) |                         |           |                           |           |
| C05-N33              | 1.941(8) |                         |           |                           |           |
| C05-N30              | 1.967(7) |                         |           |                           |           |
| C05-N21              | 1.979(6) |                         |           |                           |           |
| C05-N15              | 1.993(6) |                         |           |                           |           |

Symmetry transformations used to generate equivalent atoms: <sup>a</sup> -x+1,-y,-z

**Table S3.** Fittings of Cole-Cole plots of the variable-frequency ac data, collected at 1.8 K under different dc fields (0-1500 Oe), based on a generalized Debye model.

| $H_{dc} / \text{Oe}$ | $\chi_s (\text{cm}^3 \text{mol}^{-1})$ | $\chi_t (\text{cm}^3 \text{mol}^{-1})$ | $\tau (\text{S})$ | $\alpha$ | R                     |
|----------------------|----------------------------------------|----------------------------------------|-------------------|----------|-----------------------|
| 0                    | 0.00000                                | 102.80738                              | 0.00029           | 0.31504  | $7.66 \times 10^{-5}$ |
| 250                  | 0.00474                                | 107.72500                              | 0.00104           | 0.43970  | $2.46 \times 10^{-4}$ |
| 500                  | 0.11415                                | 94.92182                               | 0.00328           | 0.45484  | $2.32 \times 10^{-3}$ |
| 750                  | 0.00035                                | 76.06037                               | 0.00485           | 0.48083  | $1.96 \times 10^{-4}$ |
| 1000                 | 0.00026                                | 57.76386                               | 0.00587           | 0.51972  | $2.11 \times 10^{-4}$ |
| 1250                 | 0.00001                                | 42.65962                               | 0.00665           | 0.55100  | $1.61 \times 10^{-4}$ |
| 1500                 | 0.00003                                | 31.22902                               | 0.00754           | 0.57912  | $9.78 \times 10^{-5}$ |

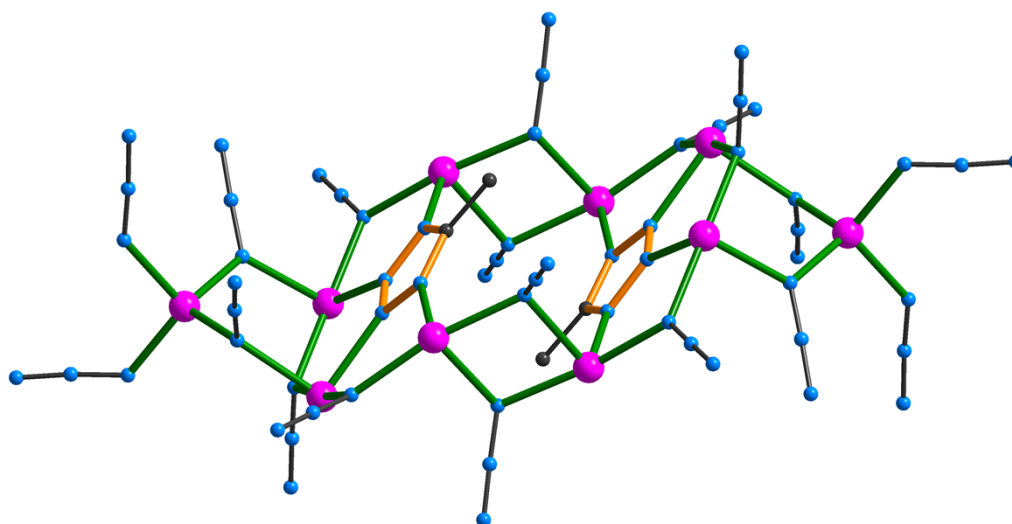

**Fig. S1** View of the double-seat chair-like structure with all bzp ligands, lattice solvent and hydrogen atoms eliminated for clarity.

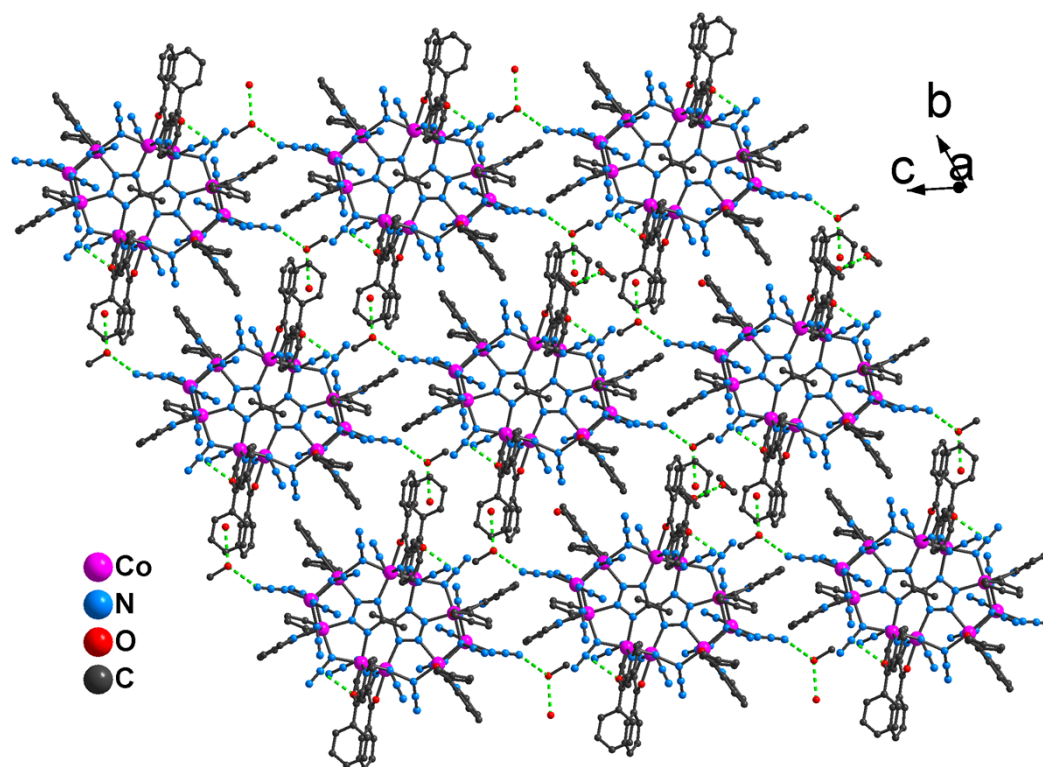

**Fig. S2** Packing view of **1** showing a 3D structure, where the decanuclear  $[\text{Co}_{10}]$  clusters are well isolated with the nearest intercluster Co...Co distance of  $9.15(2)$  Å.

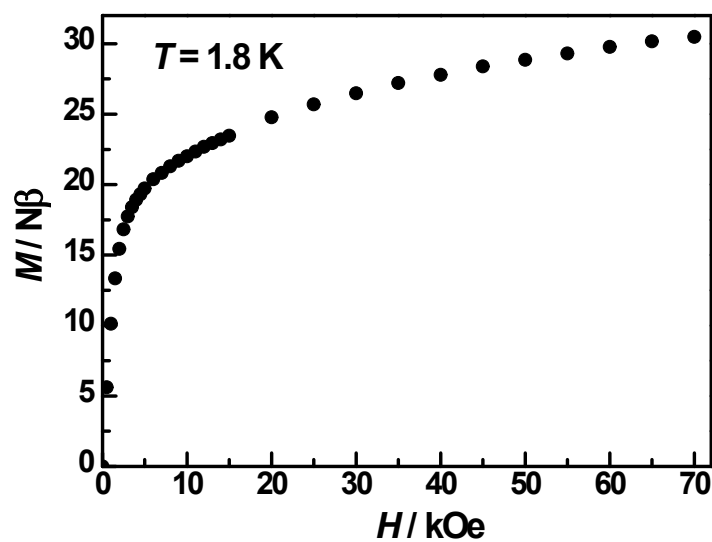

**Fig. S3** Plot of isothermal dc field dependent magnetization for **1** at 1.8 K.

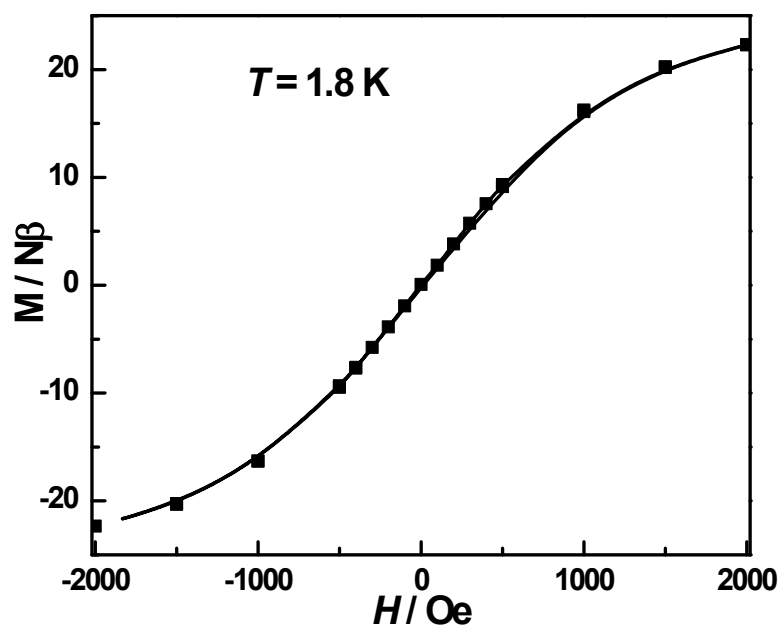

Fig. S4 Magnetic hysteresis loop at 1.8 K for **1**. Solid line is guide for eyes.

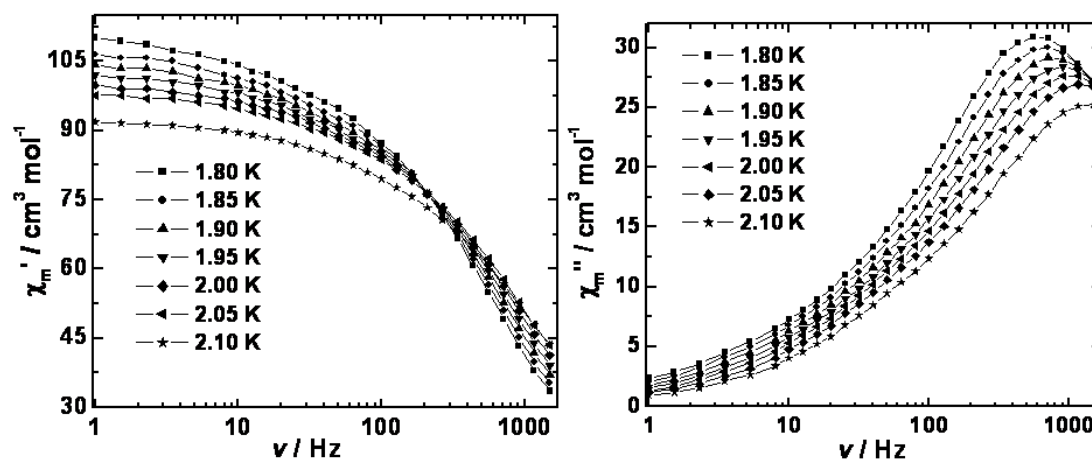

Fig. S5 Variable-frequency in-phase ( $\chi_m'$ , left) and out-of-phase ( $\chi_m''$ , right) components of the ac magnetic susceptibility data for **1**, collected at temperatures of 1.80-2.10 K with zero dc applied field and an ac field of 5 Oe.

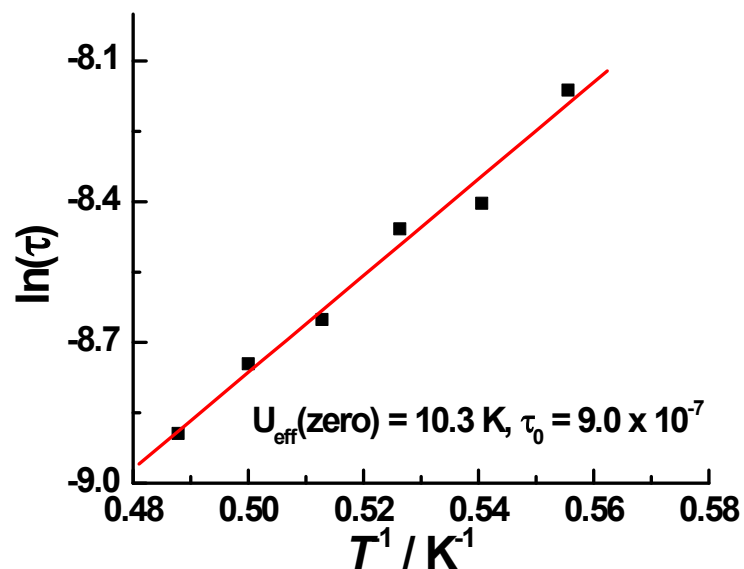

**Fig. S6** Arrhenius plot of relaxation time, as determined through variable-frequency ac susceptibilities at temperatures of 1.80 – 2.10 K and under an ac field of 5 Oe and zero dc field.

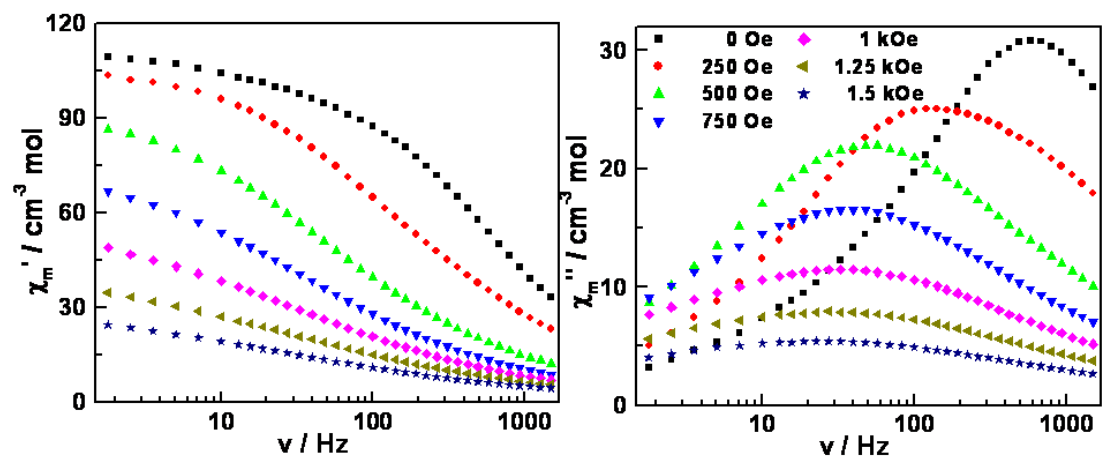

**Fig. S7** Variable-frequency in-phase ( $\chi_m'$ , left) and out-of-phase ( $\chi_m''$ , right) components of the ac magnetic susceptibility data for **1**, collected at temperatures of 1.80 K with an ac field of 5 Oe and 0-1500 Oe dc applied fields.



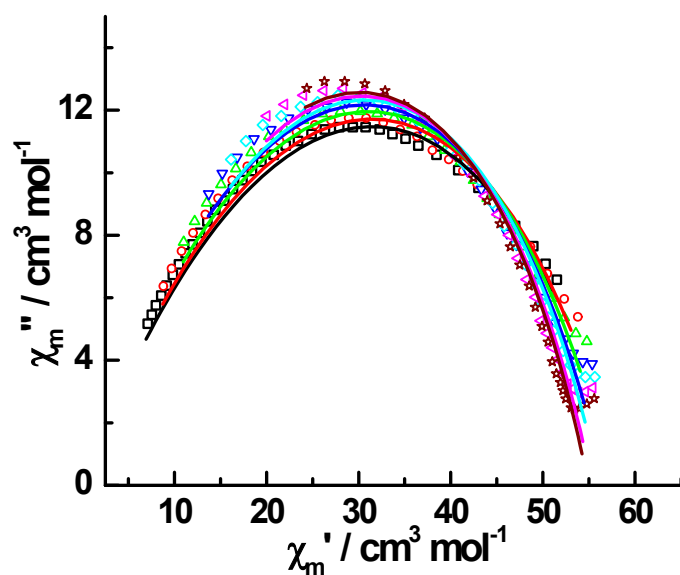

**Fig. S8** Cole-Cole diagrams of **1** at 1.8 – 2.4 K with an applied dc field of 1 kOe and ac field of 5 Oe. The solid lines are least-square fittings of the data to a distribution of single relaxation processes with a generalized Debye model.<sup>a,b</sup>

| T / K | $\chi_s$ (cm <sup>3</sup> mol <sup>-1</sup> ) | $\chi_t$ (cm <sup>3</sup> mol <sup>-1</sup> ) | $\tau$ (S) | $\alpha$ | R                     |
|-------|-----------------------------------------------|-----------------------------------------------|------------|----------|-----------------------|
| 1.8   | 0.00002                                       | 58.50841                                      | 0.00617    | 0.52397  | $2.04 \times 10^{-4}$ |
| 1.9   | 0.00052                                       | 58.37989                                      | 0.00334    | 0.51392  | $1.87 \times 10^{-4}$ |
| 2.0   | 0.00010                                       | 57.52322                                      | 0.00173    | 0.49809  | $1.64 \times 10^{-4}$ |
| 2.1   | 0.00075                                       | 56.73644                                      | 0.00094    | 0.48378  | $1.71 \times 10^{-4}$ |
| 2.2   | 0.70947                                       | 56.17240                                      | 0.00064    | 0.46711  | $1.99 \times 10^{-4}$ |
| 2.3   | 0.70675                                       | 55.36292                                      | 0.00035    | 0.45540  | $2.05 \times 10^{-4}$ |
| 2.4   | 0.73749                                       | 54.94551                                      | 0.00021    | 0.44693  | $2.13 \times 10^{-4}$ |

**Refs:** (a) Cole, K. S.; Cole, R. H. *J. Chem. Phys.* **1941**, *9*, 341. (b) Aubin, S. M.; Sun, Z.; Pardi, L.; Krzysteck, J.; Folting, K.; Brunel, L.-J.; Rheingold, A. L.; Christou, G.; Hendrickson, D. N. *Inorg. Chem.* **1999**, *38*, 5329.

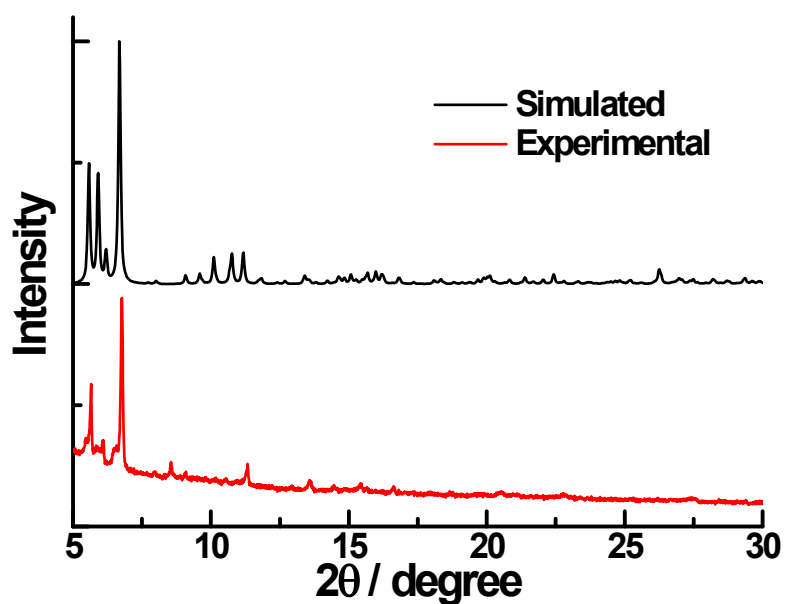

**Fig. S9** Experimental and simulated powder X-ray diffraction patterns of **1**.

The powder X-ray diffraction (PXRD) data of ground fine powder (ca. 5 mg) was collected on a POWDER\_SA BRUKER D8-Focus Bragg-Brentano X-ray Powder Diffractometer with Cu K $\alpha$  radiation (50 kV, 30 mA) between 5.0 and 35° (2 $\theta$ ) at ambient temperature. Strong diffractions on PXRD spectrum well matches with those for the simulated spectrum based on the single crystal data.
